# Supplementary material
Source: publisher figshare collection journal article supplement (https://gsapubs.figshare.com/ndownloader/files/39621013)
Supplement: Supplementary file 1 [file 39621013]

## Sheet: Blad1
Sample nr.	Coordinates from the field	DD.dddddd°	Notes	Dip direction	Dip	Injectite thickness (cm)			Ogata, K., Weert, A., Betlem, P., Birchall, T., and Senger, K., 2023, Shallow and deep subsurface sediment remobilization and intrusion in the Middle Jurassic to Lower Cretaceous Agardhfjellet Formation (Svalbard): Geosphere, v. 19, https://doi.org/10.1130/GES02555.1
I1S1	33X 519320 8696335	78.33892, 15.85627	Upper complex, I1	129	71
I1S2	33X 519321 8696331	78.33888, 15.85631	Upper complex, I1	311	71
I1S3	33X 0519328 8696365	78.33919, 15.85665	Upper complex, I1	296	71	11
I1S4	33X 0519333 8696377	78.33929, 15.85688	Upper complex, I1
I1S5	33X 0519323 8696341	78.33897, 15.85641	Upper complex, I1	293	72	29
I1S6	33X 0519311 8696290	78.33852, 15.85584	Upper complex, I1	284	63	24
I1S8	33X 0519316 8696320	78.33879, 15.85609	Upper complex, I1
I2S1	33X 519389 8696217	78.33785, 15.85925	Upper complex, I2	155	84	14.5
I2S2	33X 519379 8696212	78.33781, 15.85881	Upper complex, I2	178	49	20.5
I2S3	N78 20'16.10'' E015 51'28.01''	78.33781, 15.85778	Upper complex, I2	173	36	19
M1	N78.33944 E15.85132	78.33944, 15.85132	Mudflake + coal/wood
M2	N78.339906 E15.85626	78.33991, 15.85626	Sample for comparison
M3	N78 20.299' E015 55.351'	78.33832, 15.92252	Big clasts + coal/wood	63	82
M4	N78 20.311' E015 55.448'	78.33852, 15.92413	Big quartz clast
M5	N78 20.494' E015 55.515'	78.34157, 15.92525
I3S1	N78 20.530' E015 55.582'	78.34217, 15.92637	Lower complex, I3	293	72	5
I4S1	N78 20.523' E015 55.608'	78.34205, 15.92680	Lower complex, I4	169	20	4
M6	N78 20.530' E015 55.632'	78.34217, 15.92720	Lower complex, sill structure next to I4	351	20
I5S1	N78 20.537' E015 55.740'	78.34228, 15.92900	Lower complex, I5	227	39	26.5
I6S1	N78 20.509' E015 55.799'	78.34182, 15.92998	Lower complex, I6	Two measurements: 353/42 & 117/38
I7S1	33X 520900 8696751	78.34243, 15.92658	Lower complex, I7
I7S2	33X 520891 8696755	78.34247, 15.92618	Lower complex, I7
M13	33X 520963 8696664	78.34164, 15.92931	Lower complex, sand volcano
L1	78N20'26.54 15E49'32.18	78.34071, 15.82561	Mica dalen lens
L2	78N20'25.83 15E49'29.66	78.34051, 15.82491	Mica dalen lens
L3	78N20'24.95 15E49'37.67	78.34026, 15.82713	Mica dalen lens
F1	33X 0519193 8696045	78.33634, 15.85046	Slottsmoya member
F2	33X 0519188 8695797	78.33412, 15.85008	Slottsmoya member/Rurik formation
F3	33X 0519194 8695720	78.33343, 15.85029	Rurik formation/top Agardhfjellet formation
F4	33X 0519142 8695617	78.33251, 15.84792	Rurik formation
F5	33X 0519098 8695538	78.33181, 15.84592	Rurik formation
F6	78N13'36.88 15E36'10.65	78.22691, 15.60296	Caroline formation
F7	33X 519636 8695503	78.33142, 15.86973	Agardhfjellet silt layer
F8		Sample not in situ	Brentskardhaugen Bed
M7	33X 0519183 8696332	78.33891, 15.85020	Isolated mount
M8	33X 519048 8696364	78.33921, 15.84424	Isolated mount
K1	33X 520432 8696655	78.34164, 15.90577	Glauconite interval
M9	33X 519146 8696405	78.33957, 15.84861	Aligned mound
M10	33X 520384 8696688	78.34194, 15.90366	Carbonate mound with large wood fragments
M11	33X 520534 8696665	78.34171, 15.91030	Bioturbated bed
M12	33X 520370 8696685	78.34191, 15.90304
